# Supplementary material
Source: PubMed Central journal article supplement (PMC4116675)
Supplement: NIHMS604546-supplement-Supp_FigureS1-S3___TableS1-S2.pdf [file NIHMS604546-supplement-Supp_FigureS1-S3___TableS1-S2.pdf]

## Supplementary Figures and Tables

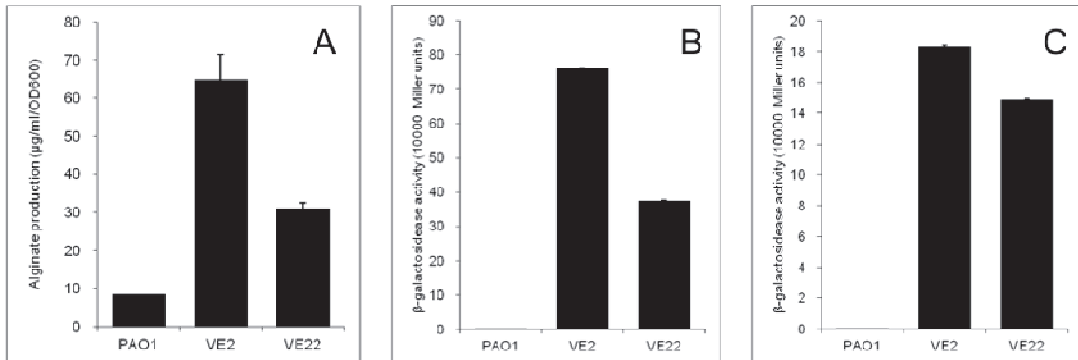

**Figure S1. Alginate production and promoter activity of  $P_{algU}$  and  $P_{algD}$  in PAO1, PAO1-VE2 (*mucE* overexpressed) and PAO1-VE22 (*cupB5* overexpressed).**

Strains were streaked on PIA plates and cultured overnight at 37°C. For alginate assay, cells were grown on PIA plates without antibiotics. For β-galactosidase assay, carbencillin (300 µg ml<sup>-1</sup>) was added to the medium to retain the plasmid. (A) Alginate production was measured after overnight culture. (B) Measurement of the activity of the *algU* promoter using pLP170- $P_{algU}$  in different strains. The  $P_{algU}$  promoter was inserted into a pLP170 vector containing the promoterless *lacZ* gene. The  $P_{algU}$ -*lacZ* fusion in pLP170 was transferred into the respective strains via triparental conjugation. β-galactosidase activity was measured using the Miller assay as described in Experimental Procedures. (C) Measurement of activity of the *algD* promoter in different strains containing pLP170- $P_{algD}$ .

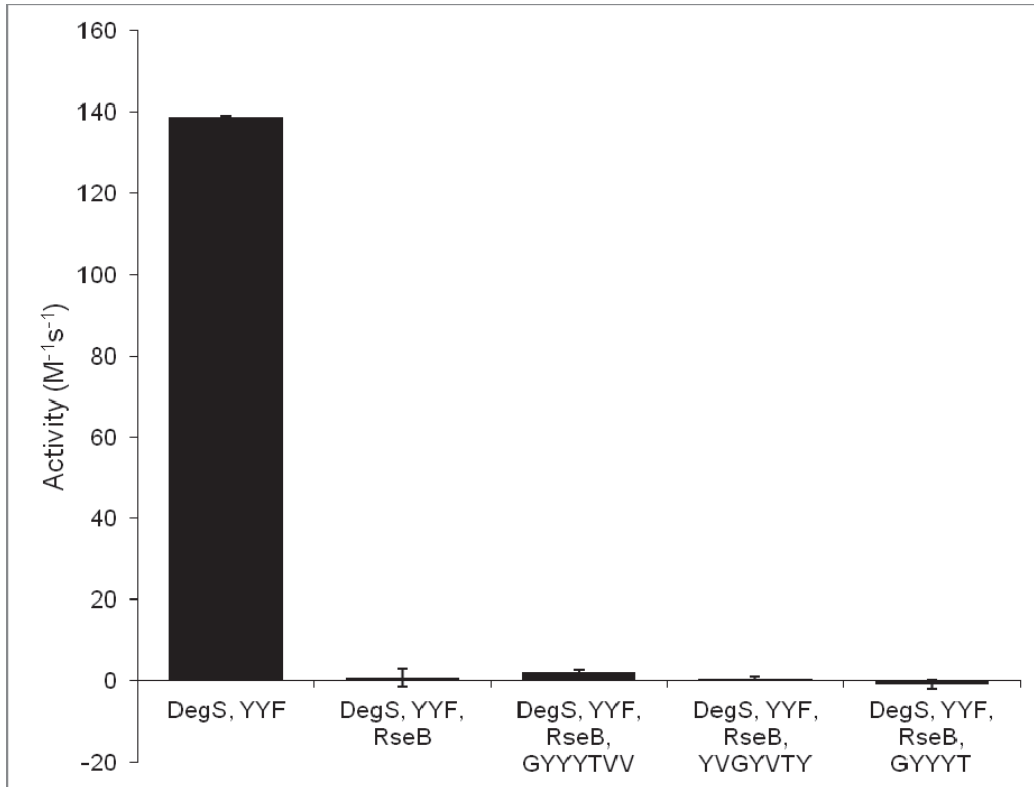

**Figure S2. CupB5 peptides do not relieve RseB inhibition of RseA cleavage by DegS.** Rates of cleavage of *E. coli* RseA<sup>peri</sup> (20  $\mu$ M) by DegS (0.5  $\mu$ M trimer) and YYF peptide (20  $\mu$ M). When present, the concentration of RseB dimer was 25  $\mu$ M and the concentrations of CupB5 peptides were 480  $\mu$ M.

|                 |                  |
|-----------------|------------------|
| PA7-5707PA      | RANGEDYRVIQNLAQ  |
| RP73PA          | VSGGYYYTVVQNLAQ  |
| PA01PA          | VSGGYYYTVVQNLAQ  |
| PAC52PA         | VSGGYYYTVVQNLAQ  |
| PA14PA          | VSGGYYYTVVQNLAQ  |
| PA7-1018PA      | VSGGYYYTVVQTLAQ  |
| NCGM2PA         | VSGGYYYTVVQNLAQ  |
| M18PA           | VSGGYYYTVVQNLAQ  |
| LESB58PA        | VSGGYYYTVVQNLAQ  |
| DK2PA           | VSGGYYYTVVQNLAQ  |
| C3719PA         | VSGGYYYTVVQNLAQ  |
| B136-33PA       | VSGGYYYTVVQNLAQ  |
| 39016PA         | VSGGYYYTVVQNLAQ  |
| 2192PA          | VSGGYYYTVVQNLAQ  |
| PF5-1467Protege | DANGDLYKVIQNAAQ  |
| CHA0-15030prote | DVNDDLTYVIQNSAQ  |
| CHA0-15070Prote | DANGAKYEVIQNAAQ  |
| CHA0-15050Prote | DANGEAYRVIQDTTQ  |
| PF5-1469Protege | DANGEAYSVIQNAATQ |
| CHA0-15060Prote | DANGEAYRVIQDTTQ  |
| 1448APsyringae  | SSNPYLLTDVYGVQGG |
| 13867Pdenitrifi | DGNGQAGTLSLIATG  |

**Figure S3. The CupB5 GYYTTVV motif is found in many orthologs in sequenced strains of *P. aeruginosa*.** A total of 22 putative *Pseudomonas* orthologs of CupB5 was obtained from [www.pseudomonas.com](http://www.pseudomonas.com). Homology was compared using the ClustalW algorithm of MacVector software. Shown is a small portion of the CupB5 amino-acid sequence containing the GYYTTVV motif when present. PA: *P. aeruginosa*; Protegens: *P. protegens*; Pdenitrifi: *P. denitrificans*; and Psyringae: *P. syringae* pv. *Phaseolicola*. *P. aeruginosa* PA7 has two copies of *cupB5* in its genome, *P. protegens* CHA0 has four copies, and strain *P. protegens* Pf-5 has two copies.

**Supplementary Table S1. Truncations of CupB5 to identify the signal that activates alginate production.**

| Strains                            | C-terminal         | Phenotype  |
|------------------------------------|--------------------|------------|
| HA- <i>cupB5</i> (1018)-His -PAO1  | -NIWH <sub>6</sub> | Mucoid     |
| HA- <i>cupB5</i> (1015)-His -PAO1  | -DYGH <sub>6</sub> | Mucoid     |
| HA- <i>cupB5</i> (585aa)-His -PAO1 | -GSGH <sub>6</sub> | Mucoid     |
| HA- <i>cupB5</i> (531aa)-His-PAO1  | -GPAH <sub>6</sub> | Mucoid     |
| HA- <i>cupB5</i> (520aa)-His-PAO1  | -SYYP <sub>6</sub> | Mucoid     |
| HA- <i>cupB5</i> (510aa)-His-PAO1  | -YVLH <sub>6</sub> | Mucoid     |
| HA- <i>cupB5</i> (507aa)-His-PAO1  | -DGLH <sub>6</sub> | Mucoid     |
| HA- <i>cupB5</i> (504aa)-His-PAO1  | -KNLH <sub>6</sub> | Mucoid     |
| HA- <i>cupB5</i> (497aa)-His-PAO1  | -AQLH <sub>6</sub> | Mucoid     |
| HA- <i>cupB5</i> (491aa)-His-PAO1  | -TVVH <sub>6</sub> | Mucoid     |
| HA- <i>cupB5</i> (490aa)-His-PAO1  | -YTVH <sub>6</sub> | Non-mucoid |
| HA- <i>cupB5</i> (489aa)-His-PAO1  | -YYTH <sub>6</sub> | Non-mucoid |
| HA- <i>cupB5</i> (488aa)-His-PAO1  | -YYYH <sub>6</sub> | Non-mucoid |
| HA- <i>cupB5</i> (483aa)-His-PAO1  | -YVSH <sub>6</sub> | Non-mucoid |
| HA- <i>cupB5</i> (404aa)-His-PAO1  | -VNWH <sub>6</sub> | Non-mucoid |
| HA- <i>cupB5</i> (353aa)-His-PAO1  | -GTWH <sub>6</sub> | Non-mucoid |
| HA- <i>cupB5</i> (231aa)-His-PAO1  | -LNFH <sub>6</sub> | Non-mucoid |
| HA- <i>cupB5</i> (176aa)-His-PAO1  | -YRFH <sub>6</sub> | Non-mucoid |
| HA- <i>cupB5</i> (144aa)-His-PAO1  | -VLFH <sub>6</sub> | Non-mucoid |
| HA- <i>cupB5</i> (135aa)-His-PAO1  | -QVFH <sub>6</sub> | Non-mucoid |
| HA- <i>cupB5</i> (132aa)-His-PAO1  | -ANGH <sub>6</sub> | Non-mucoid |

Supplementary Table S2. Strains and plasmids used in this study

| Strains and plasmids                | Phenotype and genotype                                                                             | Source or reference         |
|-------------------------------------|----------------------------------------------------------------------------------------------------|-----------------------------|
| <b><i>P. aeruginosa</i> strains</b> |                                                                                                    |                             |
| PAO1                                | Non-mucoid, prototroph                                                                             | P. Phibbs <sup>a</sup>      |
| PAO1-VE2                            | PAO1 TA flanked <i>aacCI</i> (Gm <sup>R</sup> ) inserted upstream of <i>mucE</i> (PA4033), mucoid  | (Qiu <i>et al.</i> , 2007)  |
| PAO1-VE22                           | PAO1 TA flanked <i>aacCI</i> (Gm <sup>R</sup> ) inserted upstream of <i>cupB5</i> (PA4082), mucoid | This study                  |
| PA14                                | Non-mucoid, prototroph                                                                             | F. Ausubel <sup>b</sup>     |
| FRD2                                | Non-mucoid, derived from <i>mucA22</i> strain FRD1                                                 | (Olson and Ohman, 1992)     |
| CF3715                              | Non-mucoid, clinical strain                                                                        | D. Speert <sup>c</sup>      |
| CF4009                              | Non-mucoid, clinical strain                                                                        | D. Speert <sup>c</sup>      |
| CF2                                 | Non-mucoid, <i>mucA</i> mutant, <i>algU</i> wild type, derived from clinical mucoid strain         | (Yin <i>et al.</i> , 2013a) |
| CF14                                | Non-mucoid, <i>mucA</i> mutant, <i>algU</i> mutant, derived from clinical mucoid strain            | (Yin <i>et al.</i> , 2013b) |
| CF17                                | Non-mucoid, <i>mucA</i> mutant, <i>algU</i> wild type, derived from clinical mucoid strain         | (Yin <i>et al.</i> , 2013b) |
| CF4349                              | Non-mucoid, <i>mucA</i> mutant, <i>algU</i> wild type, derived from clinical mucoid strain         | (Yin <i>et al.</i> , 2013b) |
| PAO1 $\Delta$ <i>algW</i>           | PAO1 <i>algW</i> ::tet <sup>R</sup> , nonmucoid                                                    | (Qiu <i>et al.</i> , 2007)  |
| PAO1 $\Delta$ <i>mucP</i>           | PAO1 <i>mucP</i> ::tet <sup>R</sup> , nonmucoid                                                    | (Qiu <i>et al.</i> , 2007)  |
| PAO1 $\Delta$ <i>clpX</i>           | PAO1 <i>clpX</i> ::Gm <sup>R</sup>                                                                 | (Qiu <i>et al.</i> , 2008b) |
| PAO1 $\Delta$ <i>clpP</i>           | PAO1 <i>clpP</i> ::Gm <sup>R</sup>                                                                 | (Qiu <i>et al.</i> , 2008b) |
| PAO1 $\Delta$ <i>algU</i>           | PAO1 with in-frame deletion of <i>algU</i>                                                         | (Qiu <i>et al.</i> , 2007)  |
| PAO1 $\Delta$ <i>algD</i>           | PAO1 with in-frame deletion of <i>algD</i>                                                         | This study                  |
| <b><i>E. coli</i> strains</b>       |                                                                                                    |                             |
| TOP10                               | DH5 $\alpha$ derivative                                                                            | Invitrogen                  |
| SM10/1 pir                          | <i>thi thr leu tonA lacY supE recA</i> :: RP4-2-Tc :: Mu lpirR6K Km <sup>R</sup>                   | Laboratory strain           |
| <b>Plasmids</b>                     |                                                                                                    |                             |
| pFAC                                | Mini-himarI mariner transposon with a selectable marker Gm <sup>R</sup> Ap <sup>R</sup>            | (Wong and Mekalanos, 2000)  |

|                                  |                                                                                               |                                        |
|----------------------------------|-----------------------------------------------------------------------------------------------|----------------------------------------|
| pRK2013                          | Km <sup>R</sup> <i>Tra Mob ColE1</i>                                                          | (Figurski and Helinski, 1979)          |
| pHERD 20T                        | pUCP20T <i>P<sub>lac</sub></i> replaced by fragment of <i>araC</i> -P <sub>BAD</sub> cassette | (Qiu <i>et al.</i> , 2008a)            |
| pLP170                           | 8.3-kb, <i>lacZ</i> , <i>ApR</i> , multiple cloning site                                      | Passador Lab <sup>d</sup>              |
| PHERD 20T-HA- <i>cupB5</i> -His  | <i>cupB5</i> (PA4082) from PAO1 in pHERD20T EcoRI/HindIII                                     | This study                             |
| PHERD 20T-                       | <i>cupB5</i> (PA4082) from PAO1 in pHERD20T EcoRI/HindIII                                     | This study                             |
| PHERD 20T-HA- <i>cupB5</i> (585) | <i>cupB5</i> (PA4082) from PAO1 in pHERD20T EcoRI/HindIII                                     | This study                             |
| PHERD 20T-HA- <i>cupB5</i> (531) | <i>cupB5</i> (PA4082) from PAO1 in pHERD20T EcoRI/HindIII                                     | This study                             |
| PHERD 20T-HA- <i>cupB5</i> (520) | <i>cupB5</i> (PA4082) from PAO1 in pHERD20T EcoRI/HindIII                                     | This study                             |
| PHERD 20T-HA- <i>cupB5</i> (510) | <i>cupB5</i> (PA4082) from PAO1 in pHERD20T EcoRI/HindIII                                     | This study                             |
| PHERD 20T-HA- <i>cupB5</i> (507) | <i>cupB5</i> (PA4082) from PAO1 in pHERD20T EcoRI/HindIII                                     | This study                             |
| PHERD 20T-HA- <i>cupB5</i> (504) | <i>cupB5</i> (PA4082) from PAO1 in pHERD20T EcoRI/HindIII                                     | This study                             |
| PHERD 20T-HA- <i>cupB5</i> (497) | <i>cupB5</i> (PA4082) from PAO1 in pHERD20T EcoRI/HindIII                                     | This study                             |
| PHERD 20T-HA- <i>cupB5</i> (491) | <i>cupB5</i> (PA4082) from PAO1 in pHERD20T EcoRI/HindIII                                     | This study                             |
| PHERD 20T-HA- <i>cupB5</i> (490) | <i>cupB5</i> (PA4082) from PAO1 in pHERD20T EcoRI/HindIII                                     | This study                             |
| PHERD 20T-HA- <i>cupB5</i> (489) | <i>cupB5</i> (PA4082) from PAO1 in pHERD20T EcoRI/HindIII                                     | This study                             |
| PHERD 20T-HA- <i>cupB5</i> (488) | <i>cupB5</i> (PA4082) from PAO1 in pHERD20T EcoRI/HindIII                                     | This study                             |
| PHERD 20T-HA- <i>cupB5</i> (483) | <i>cupB5</i> (PA4082) from PAO1 in pHERD20T EcoRI/HindIII                                     | This study                             |
| PHERD 20T-HA- <i>cupB5</i> (404) | <i>cupB5</i> (PA4082) from PAO1 in pHERD20T EcoRI/HindIII                                     | This study                             |
| PHERD 20T-HA- <i>cupB5</i> (353) | <i>cupB5</i> (PA4082) from PAO1 in pHERD20T EcoRI/HindIII                                     | This study                             |
| PHERD 20T-HA- <i>cupB5</i> (231) | <i>cupB5</i> (PA4082) from PAO1 in pHERD20T EcoRI/HindIII                                     | This study                             |
| PHERD 20T-HA- <i>cupB5</i> (176) | <i>cupB5</i> (PA4082) from PAO1 in pHERD20T EcoRI/HindIII                                     | This study                             |
| PHERD 20T-HA- <i>cupB5</i> (144) | <i>cupB5</i> (PA4082) from PAO1 in pHERD20T EcoRI/HindIII                                     | This study                             |
| PHERD 20T-HA- <i>cupB5</i> (135) | <i>cupB5</i> (PA4082) from PAO1 in pHERD20T EcoRI/HindIII                                     | This study                             |
| PHERD 20T-HA- <i>cupB5</i> (132) | <i>cupB5</i> (PA4082) from PAO1 in pHERD20T EcoRI/HindIII                                     | This study                             |
| pEX100- <i>ΔalgW</i>             | A 1.4-kb <i>algW</i> -flanked fragment with in-frame deletion of <i>algW</i> in pEX100 NotI   | (Qiu <i>et al.</i> , 2007)             |
| pLP170-P <sub><i>algW</i></sub>  | Promoter of <i>algW</i> (PA4446) from PAO1 in pLP170 EcoRI/HindIII                            | (T. Ryan Withers <i>et al.</i> , 2013) |

---

|                          |                                                                    |                                        |
|--------------------------|--------------------------------------------------------------------|----------------------------------------|
| pLP170-P <sub>algU</sub> | Promoter of <i>algU</i> (PA0762) from PAO1 in pLP170 EcoRI/HindIII | (T. Ryan Withers <i>et al.</i> , 2013) |
| pLP170-P <sub>algD</sub> | Promoter of <i>algD</i> (PA3540) from PAO1 in pLP170 EcoRI/HindIII | (T. Ryan Withers <i>et al.</i> , 2013) |

<sup>a</sup>, East Carolina University, USA; <sup>b</sup>, Harvard Medical School, USA; <sup>c</sup>,

University of British Columbia, CA; <sup>d</sup>University of Rochester, USA.

## References:

- Figurski D.H., Helinski D.R. (1979). Replication of an origin-containing derivative of plasmid RK2 dependent on a plasmid function provided in trans. *Proc Natl Acad Sci U S A* **76**: 1648-1652.
- Olson J.C., Ohman D.E. (1992). Efficient production and processing of elastase and LasA by *Pseudomonas aeruginosa* require zinc and calcium ions. *J Bacteriol* **174**: 4140-4147.
- Qiu D., Damron F.H., Mima T., Schweizer H.P., Yu H.D. (2008a). PBAD-based shuttle vectors for functional analysis of toxic and highly regulated genes in *Pseudomonas* and *Burkholderia spp.* and other bacteria. *Appl Environ Microbiol* **74**: 7422-7426.
- Qiu D., Eisinger V.M., Head N.E., Pier G.B., Yu H.D. (2008b). ClpXP proteases positively regulate alginate overexpression and mucoid conversion in *Pseudomonas aeruginosa*. *Microbiology* **154**: 2119-2130.
- Qiu D., Eisinger V.M., Rowen D.W., Yu H.D. (2007). Regulated proteolysis controls mucoid conversion in *Pseudomonas aeruginosa*. *Proc Natl Acad Sci U S A* **104**: 8107-8112.
- Withers T.R., Damron F.H., Yin Y., Yu H.D. (2013). Truncation of type IV pilin induces mucoidy in *Pseudomonas aeruginosa* strain PAO579. *Microbiology Open* (accepted).
- Wong S.M., Mekalanos J.J. (2000). Genetic footprinting with mariner-based transposition in *Pseudomonas aeruginosa*. *Proc Natl Acad Sci U S A* **97**: 10191-10196.
